# Supplementary material for: Optimisation of phosphate loading on graphene oxide–Fe(iii) composites – possibilities for engineering slow release fertilisers
Source: Royal Society of Chemistry journal article supplement (doi:10.1039/c9nj01641d), 2019-01-01
Supplement: c9nj01641d1.pdf [file c9nj01641d1.pdf]

## **Supplementary material**

### **Optimisation of phosphate loading on graphene oxide-Fe(III) composites – possibilities for engineering slow release fertilisers**

**Ivan B. Andelkovic<sup>a, b, \*</sup>, Shervin Kabiri<sup>b</sup>, Rodrigo C. da Silva<sup>a</sup>, Ehsan Tavakkoli<sup>a, c, d</sup>, Jason K. Kirby<sup>e</sup>, Dusan Losic<sup>b</sup> and Michael J. McLaughlin<sup>a</sup>**

<sup>a</sup> School of Agriculture, Food and Wine, The University of Adelaide, PMB 1, Waite Campus, Glen Osmond, SA 5064, Australia

<sup>b</sup> School of Chemical Engineering, The University of Adelaide, SA 5005, Australia

<sup>c</sup> NSW Department of Primary Industries, Wagga Wagga Agricultural Institute, Wagga Wagga, NSW 2650, Australia

<sup>d</sup> Graham Centre for Agricultural Innovation, Charles Sturt University, Wagga Wagga, NSW 2650, Australia

<sup>e</sup> CSIRO Land and Water, Environmental Contaminant Mitigation and Biotechnology Program, PMB 2, Glen Osmond, SA 5064, Australia

For publication in *New Journal of Chemistry*.

## Graphene oxide preparation

Natural graphite rock (Eyre Peninsula, South Australia) was sourced from a local mine and milled into a fine powder using a benchtop ring mill (Rocklabs, NZ). The GO sheets were prepared using a modified Hammer method<sup>1, 2</sup>. Briefly, a 9 : 1 mixture of concentrated sulphuric acid and phosphoric acid (240 : 27 mL) was cooled to 4° C. Under stirring at room temperature the cooled acid mixture was added slowly to the graphite powder (2 g) and potassium permanganate (12 g), then heated to 50° C for about 12 h, forming a thick paste. The reaction was cooled to room temperature and poured onto ice (300 mL) with hydrogen peroxide (2 mL). The mixture was first washed with distilled water twice, then with hydrochloric acid (32 %) and finally twice with ethanol. For each successive wash, the product was centrifuged at 2950 g for 1 h to remove the product from the supernatant. The light brown GO obtained was vacuum dried overnight at 45° C.

Table S1. Selected physical and chemical properties of soils.

| Soils          | pH (H <sub>2</sub> O)<br>1 : 5 | Organic C<br>(%) | CaCO <sub>3</sub><br>(%) | CEC<br>(cmol <sub>c</sub> kg <sup>-1</sup> ) | Clay<br>(%) | Fe <sub>ox</sub><br>(mg kg <sup>-1</sup> ) | Al <sub>ox</sub><br>(mg kg <sup>-1</sup> ) | Total P<br>(mg kg <sup>-1</sup> ) |
|----------------|--------------------------------|------------------|--------------------------|----------------------------------------------|-------------|--------------------------------------------|--------------------------------------------|-----------------------------------|
| Port Wakefield | 9.1                            | 0.8              | 8.1                      | 22.3                                         | 4.2         | 293                                        | 409                                        | 79                                |
| Black Point    | 8.5                            | 1.6              | < 0.5                    | 16.4                                         | 18.1        | 557                                        | 1269                                       | 57                                |
| Monarto        | 7.9                            | 1.0              | < 0.5                    | 8.2                                          | 8.3         | 351                                        | 535                                        | 148                               |

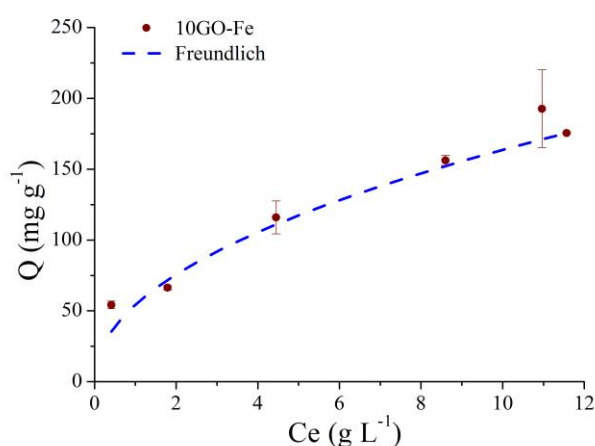

Fig. S1. Adsorption isotherm of P loading onto 10GO-Fe. Initial P concentrations 1.5 – 15 g L<sup>-1</sup>, sorbent dosage 10 g L<sup>-1</sup>, initial pH 6.0. Error bars represent standard deviations (n = 3)

## References:

1. S. Kabiri, F. Degryse, D. N. H. Tran, R. C. da Silva, M. J. McLaughlin and D. Losic, *ACS Applied Materials & Interfaces*, 2017, 9, 43325-43335.
2. D. C. Marcano, D. V. Kosynkin, J. M. Berlin, A. Sinitskii, Z. Sun, A. Slesarev, L. B. Alemany, W. Lu and J. M. Tour, *ACS Nano*, 2010, 4, 4806-4814.
